# Supplementary material
Source: PubMed Central journal article supplement (PMC5295843)

S1)

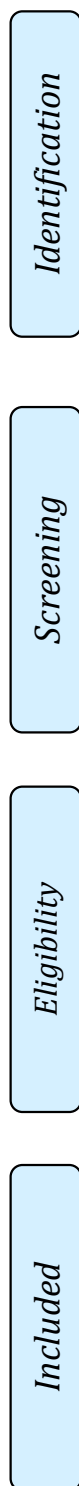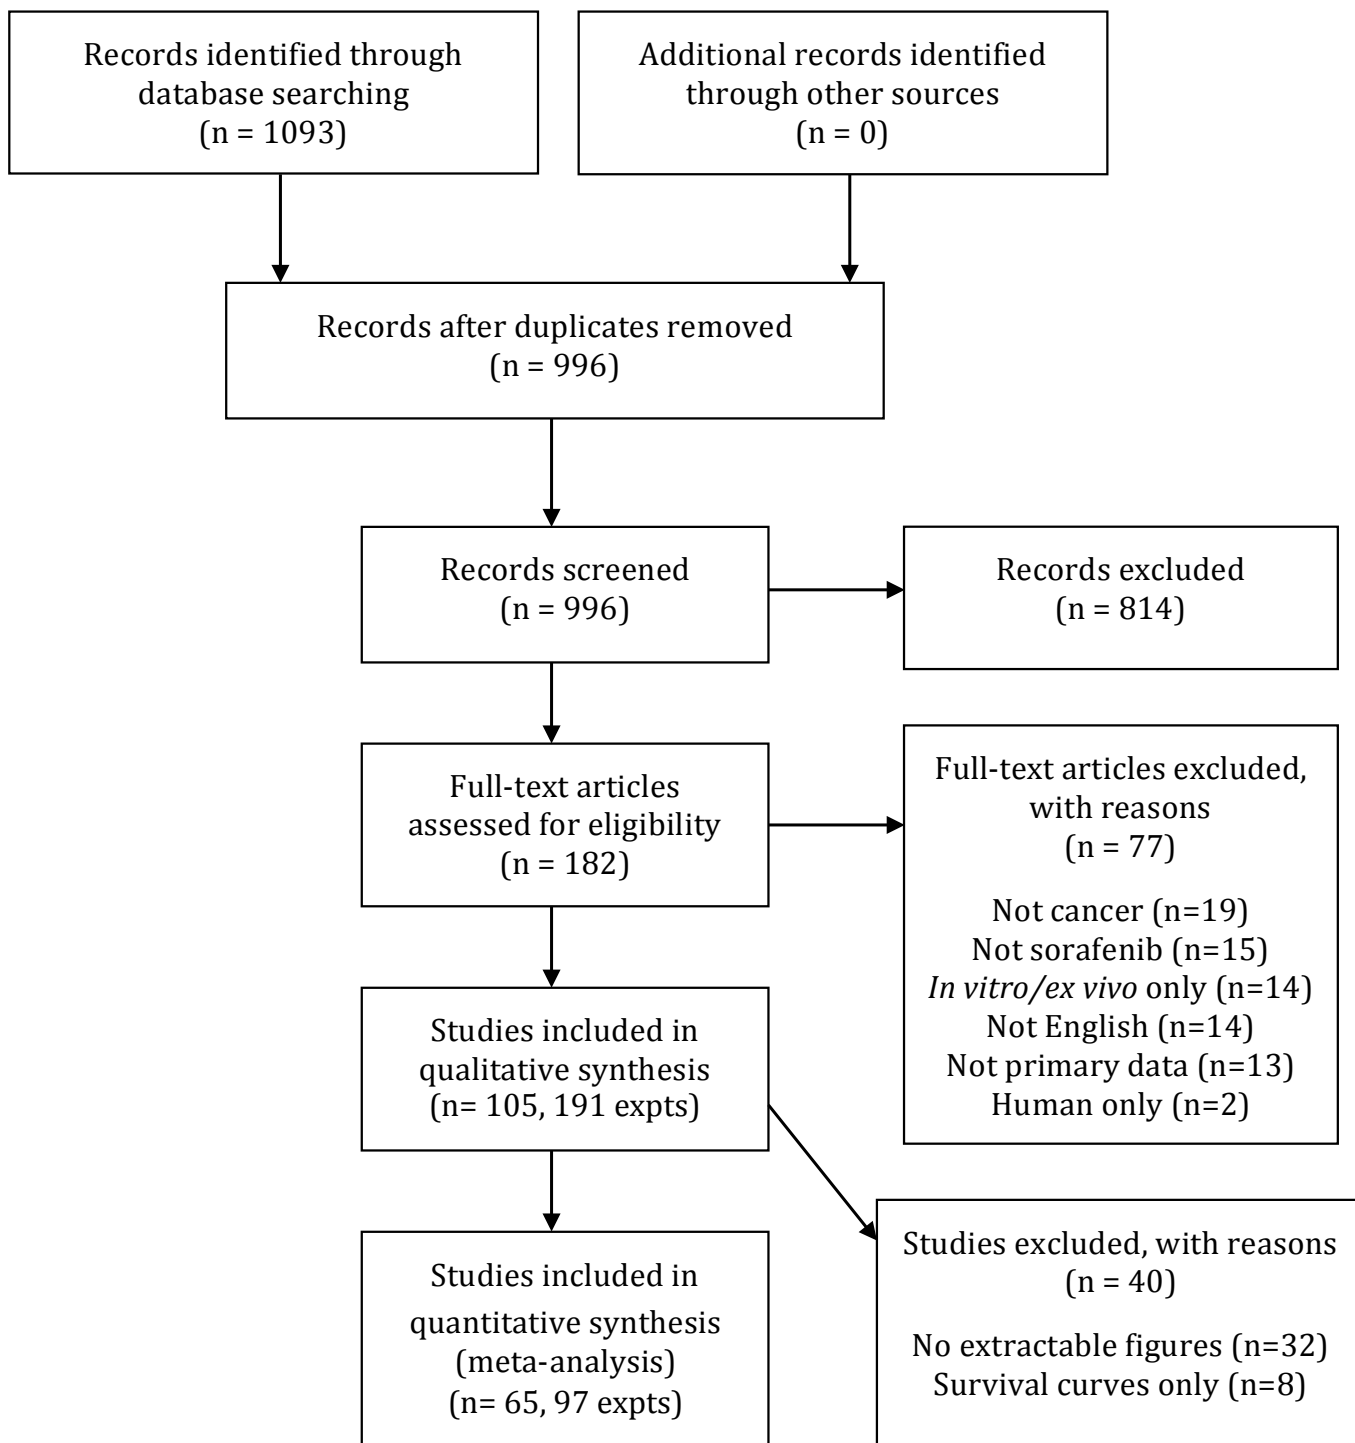

Supplement: NIHMS5780-supplement-SuppFig1.pdf [file NIHMS5780-supplement-SuppFig1.pdf]

S2A)

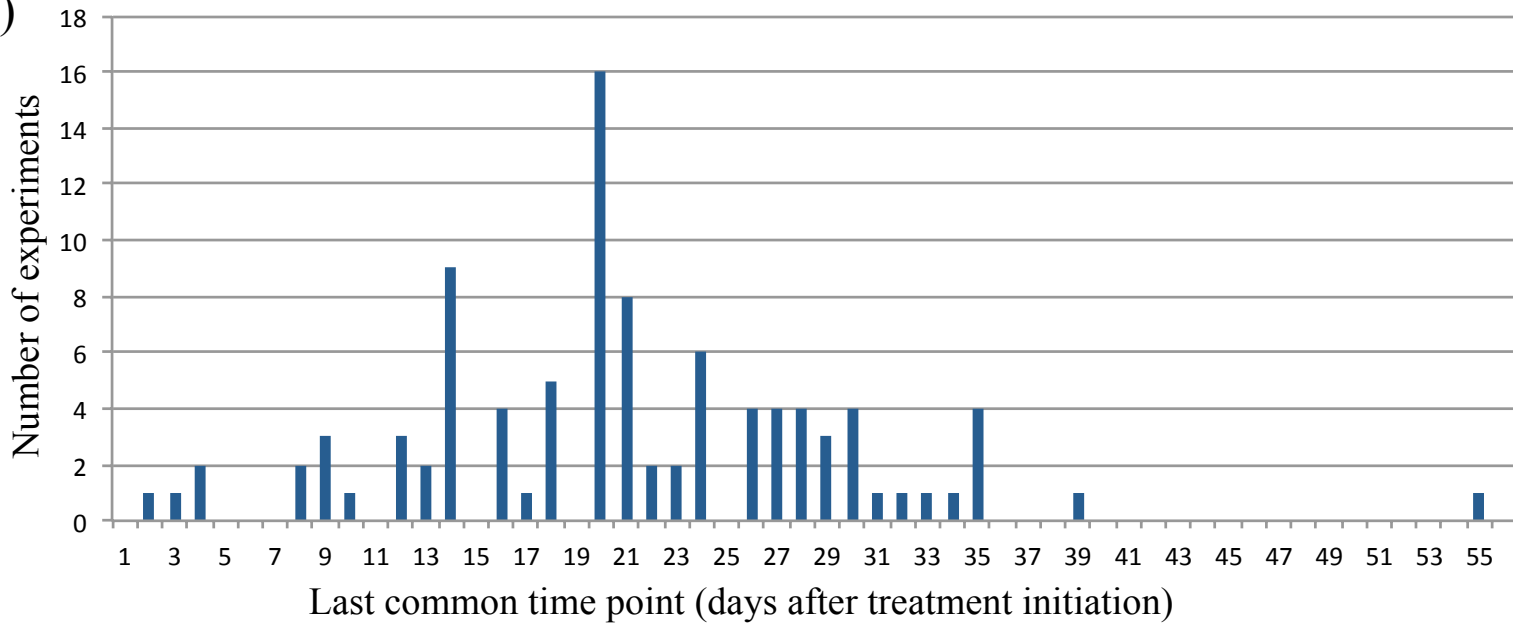

S2B)

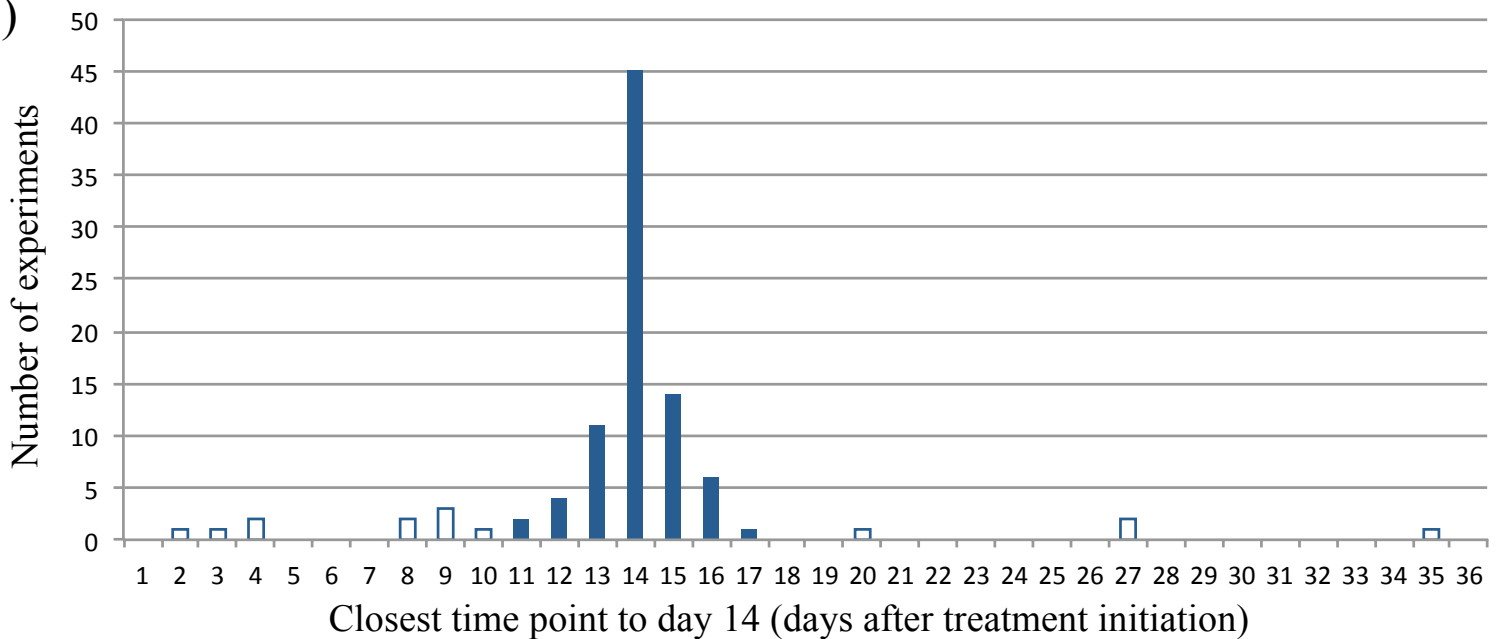

Supplement: NIHMS5780-supplement-SuppFig2.pdf [file NIHMS5780-supplement-SuppFig2.pdf]

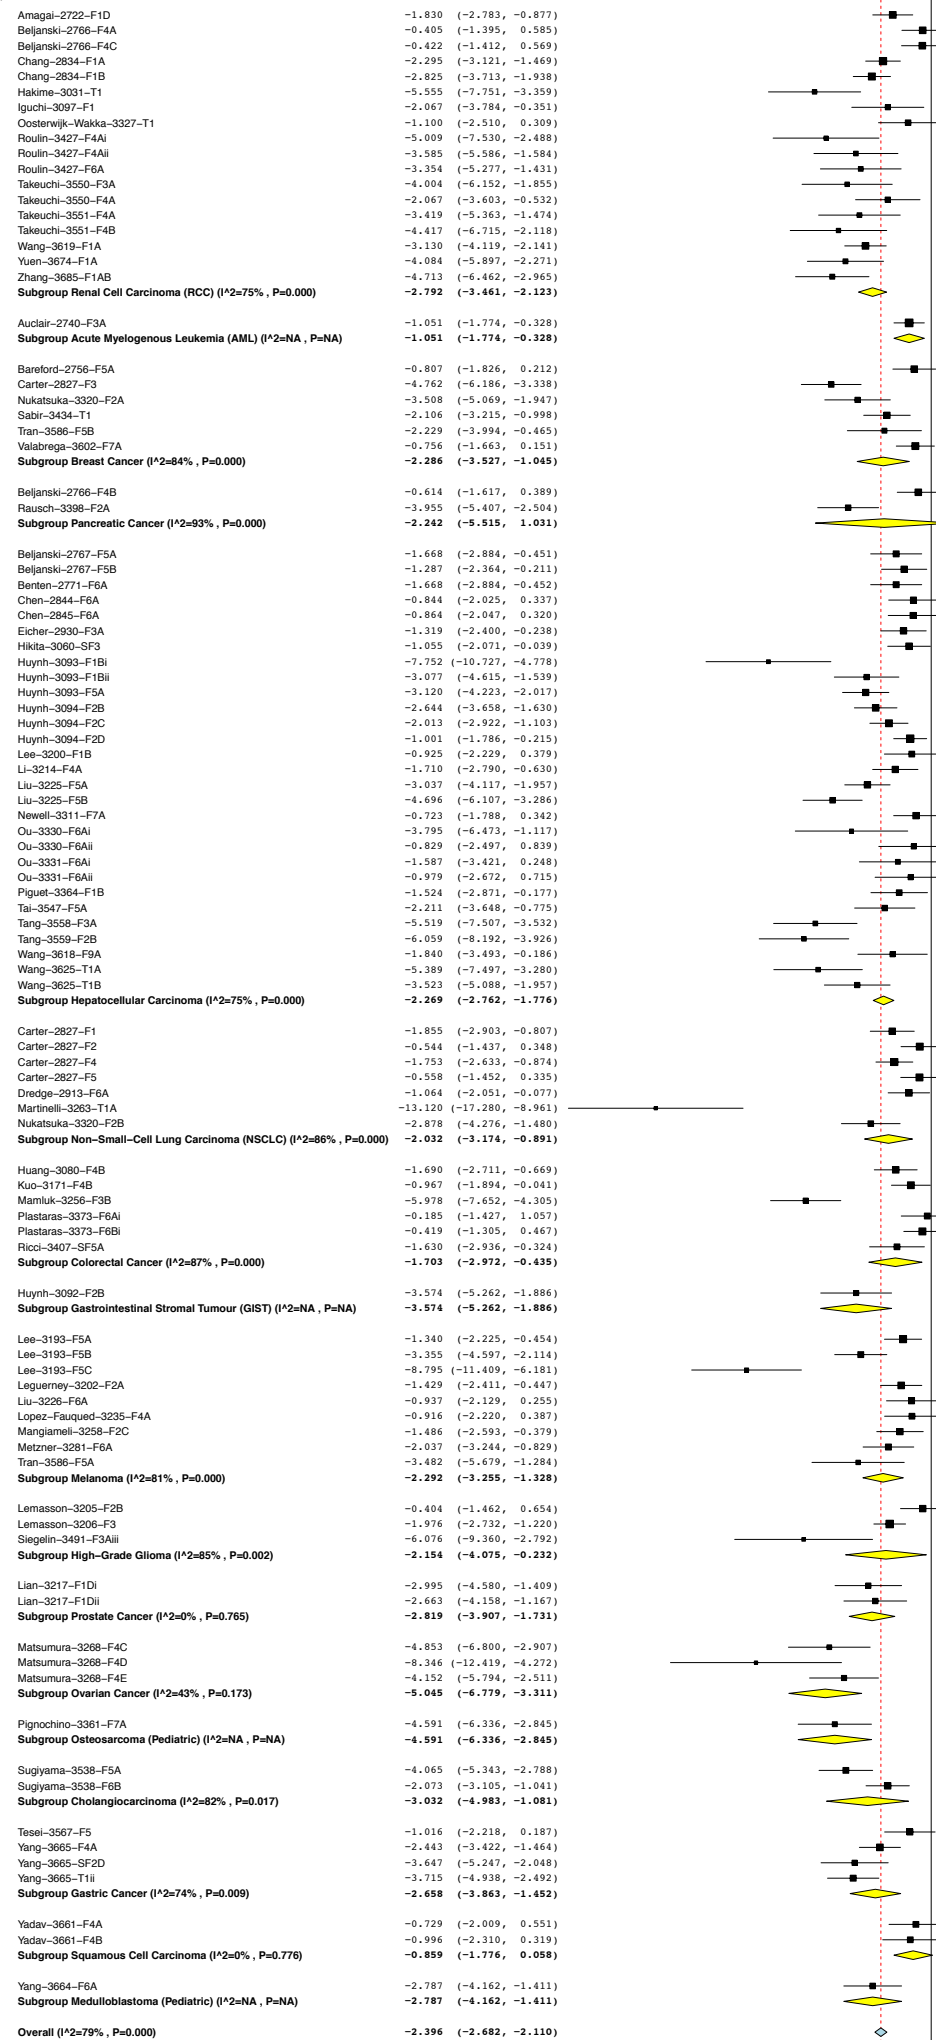

Supplement: NIHMS5780-supplement-SuppFig3.pdf [file NIHMS5780-supplement-SuppFig3.pdf]
